# Supplementary material for: Diagnostic Performance of Biomarkers Urinary KIM-1 and YKL-40 for Early Diabetic Nephropathy, in Patients with Type 2 Diabetes: A Systematic Review and Meta-Analysis
Source: PubMed Central journal article supplement (PMC7695026; doi:10.3390/diagnostics10110909), 2020-11-07
Supplement: diagnostics-10-00909-s001.pdf [file diagnostics-10-00909-s001.pdf]

**Table S1.** Descriptive statistical results of controls and T2DM patients with normo-, micro- and macroalbuminuria, in studies involving KIM-1.

| Type of participants             | Controls (healthy) | Type 2 Diabetes with normoalbuminuria | Type 2 Diabetes with microalbuminuria | Type 2 Diabetes with macroalbuminuria |
|----------------------------------|--------------------|---------------------------------------|---------------------------------------|---------------------------------------|
| no. of participants              | 196                | 282                                   | 92                                    | 135                                   |
| Sex (%male)                      | 48.4               | 43.5                                  | 47.2                                  | 52.1                                  |
| Age                              | 49.6               | 55.1                                  | 56.8                                  | 59.2                                  |
| eGFR(mL/min/1,73m <sup>2</sup> ) | 105.9              | 99.0                                  | 96.6                                  | 73.3                                  |
| HbA1c (%)                        | 4.5                | 7.6                                   | 8.0                                   | 8.7                                   |
| UACR (mg/g Cr)                   | 7.9                | 12.4                                  | 82.7                                  | 7521.0                                |

eGFR: estimated glomerular filtration rate, HbA1c: glycated hemoglobin A1c, UACR: urinary albumin-creatinine ratio.

**Table S2.** Descriptive statistical results of controls and T2DM patients with normo-, micro- and macroalbuminuria, in studies involving YKL-40.

| Type of participants             | Controls (healthy) | Type 2 Diabetes with normoalbuminuria | Type 2 Diabetes with microalbuminuria | Type 2 Diabetes with macroalbuminuria |
|----------------------------------|--------------------|---------------------------------------|---------------------------------------|---------------------------------------|
| no. of participants              | 402                | 483                                   | 457                                   | 416                                   |
| Sex (%male)                      | 50.1               | 50.5                                  | 51.3                                  | 52.5                                  |
| Age                              | 53.6               | 54.6                                  | 55.1                                  | 56.0                                  |
| eGFR(mL/min/1,73m <sup>2</sup> ) | 105.3              | 86.8                                  | 77.8                                  | 67.1                                  |
| HbA1c (%)                        | 5.4                | 8.3                                   | 8.6                                   | 8.8                                   |
| UACR (mg/g Cr)                   | 8.8                | 12.4                                  | 81.7                                  | 740.5                                 |

eGFR: estimated glomerular filtration rate, HbA1c: glycated hemoglobin A1c, UACR: urinary albumin-creatinine ratio.

**Table S3.** Risk of bias and applicability concern graph for the studies concerning uKIM-1. Each risk of bias item of all included studies, is represented as percentage (%).

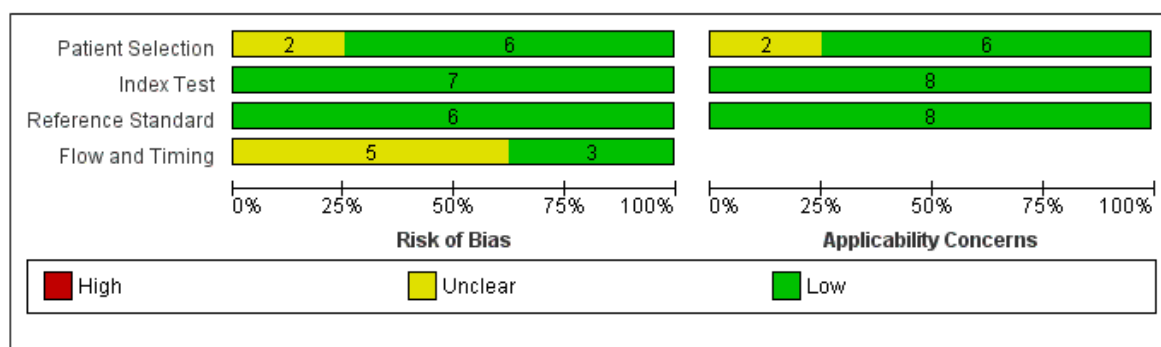

**Table S4.** Risk of bias and applicability concern graph for the studies concerning YKL-40. Each risk of bias item of all included studies, is represented as percentage (%).

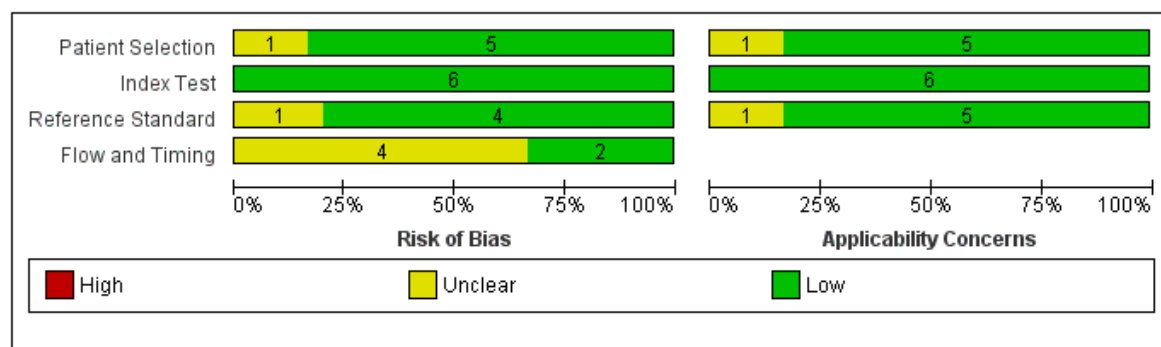

**Table S5.** Correlation analysis of KIM-1 and YKL-40 with eGFR, HbA1c and UACR.

| Parameters                        | n. of studies | KIM-1 |                   | n. of studies | YKL-40 |                   |
|-----------------------------------|---------------|-------|-------------------|---------------|--------|-------------------|
|                                   |               | r     | p value           |               | r      | p value           |
| duration of diabetes              | 5             | 0.56  | 0.161             | 5             | 0.75   | 0.066             |
| eGFR (mL/min/1,73m <sup>2</sup> ) | 4             | -0.95 | 0.001             | 5             | -0.68  | 0.148             |
| HbA1c (%)                         | 4             | 0.83  | <10 <sup>-4</sup> | 6             | 0.86   | <10 <sup>-4</sup> |
| UACR (mg/g Cr)                    | 5             | 0.91  | 0.003             | 4             | 0.88   | 0.004             |

eGFR: estimated glomerular filtration rate, HbA1c: glycated hemoglobin A1c, UACR: urinary albumin-creatinine ratio. p value <0.05 denotes a statistically significant result.
